# Supplementary material for: Wayfinding artificial intelligence to detect uncertain spots of OCT image in retinal diseases
Source: Research Square preprint supplement (doi:10.21203/rs.3.rs-1537787/v1), 2022-04-27
Supplement: Supplementary file 1 [file a140ca7e2224c975d54153ab.xlsx]

## Sheet: data
ID	Annotation	ALL	ILM	NFL/GCL	IPL/INL	OPL/ONL	EZ	RPE/BM	UI	ILM	NFL/GCL	IPL/INL	OPL/ONL	IS/OS	RPE/BM	ALL
1		0	0	0	0	0	0	0		1.75225	2.2226	2.79975	2.53725	2.35315	1.68236	2.22456
2		0	0	0	0	0	0	0		1.74072	2.33473	2.13917	1.70451	3.02557	1.63884	2.09726
3		0	0	0	0	0	0	0		1.79193	2.50282	2.49628	2.17412	1.78859	1.70132	2.07584
4		0	0	0	0	0	0	0		2.09122	2.39049	2.20273	1.91272	1.94157	1.51391	2.00877
5		0	0	0	0	0	0	0		2.00055	2.27426	2.3165	2.03221	1.6784	1.54804	1.97499
6		0	0	0	0	0	0	0		1.81896	1.81034	2.56096	2.16122	1.46038	2.03681	1.97478
7		0	0	0	0	0	0	0		1.72117	2.55962	2.33181	1.95548	1.56941	1.617	1.95908
8		0	0	0	0	0	0	0		1.58133	1.7558	2.31507	2.36669	1.82253	1.90616	1.95793
9		0	0	0	0	0	0	0		1.97867	1.99972	2.27568	2.06705	1.66334	1.75352	1.95633
10		0	0	0	0	0	0	0		1.48969	1.74469	2.78259	2.60978	1.52519	1.55329	1.95087
11		0	0	0	0	0	0	0		1.66323	2.07689	2.37695	2.39743	1.56818	1.57886	1.94359
12		0	0	0	0	0	0	0		1.75605	2.47826	2.37232	1.86937	1.55891	1.60514	1.94001
13		0	0	0	0	0	0	0		1.85143	2.04696	2.06083	1.78704	2.03914	1.81934	1.93412
14		0	0	0	0	0	0	0		1.69724	2.18217	2.74655	1.86666	1.63575	1.44907	1.92957
15		0	0	0	0	0	0	0		1.66653	2.18458	2.24789	2.40037	1.599	1.42834	1.92112
16		0	0	0	0	0	0	0		1.85703	2.04856	2.13912	1.85206	1.69879	1.85175	1.90789
17		0	0	0	0	0	0	0		1.55865	2.02626	2.59974	2.09143	1.62373	1.54678	1.90777
18		0	0	0	0	0	0	0		1.98926	2.09009	2.10448	1.98371	1.67661	1.55407	1.8997
19		0	0	0	0	0	0	0		1.73458	2.29803	2.12909	2.20226	1.48008	1.51188	1.89265
20		0	0	0	0	0	0	0		1.54816	2.11604	2.33224	2.17581	1.48418	1.68006	1.88942
21		0	0	0	0	0	0	0		1.66204	1.85854	2.50337	2.29604	1.49101	1.51209	1.88718
22		0	0	0	0	0	0	0		1.67596	2.31193	2.07575	1.87049	1.52284	1.7651	1.87035
23		0	0	0	0	0	0	0		1.72003	1.86165	2.14408	2.08503	1.85472	1.5054	1.86182
24		0	0	0	0	0	0	0		1.76232	1.88499	2.05007	1.9618	1.81274	1.69359	1.86092
25		0	0	0	0	0	0	0		1.88802	1.97668	2.1842	2.09064	1.53825	1.45601	1.85563
26		0	0	0	0	0	0	0		1.62512	1.98472	2.15633	2.42957	1.3666	1.56607	1.85474
27		0	0	0	0	0	0	0		1.79886	1.90786	2.1513	1.91394	1.51438	1.82016	1.85108
28		0	0	0	0	0	0	0		1.63732	1.9481	2.39981	2.27735	1.39538	1.442	1.84999
29		0	0	0	0	0	0	0		1.78136	1.94882	2.13946	1.85225	1.61155	1.75835	1.84863
30		0	0	0	0	0	0	0		1.71787	2.04565	2.18274	2.12111	1.51648	1.50096	1.84747
31		0	0	0	0	0	0	0		1.97472	2.21027	2.08972	1.95992	1.38393	1.42423	1.84046
32		0	0	0	0	0	0	0		1.58156	1.93086	2.32704	2.11504	1.45805	1.61906	1.8386
33		0	0	0	0	0	0	0		1.73581	1.84226	2.0011	1.76687	1.75645	1.92658	1.83818
34		0	0	0	0	0	0	0		1.67006	1.96297	2.03062	1.81863	1.84861	1.68034	1.8352
35		0	0	0	0	0	0	0		1.60545	1.83775	1.95087	1.73724	1.69132	2.16721	1.83164
36		0	0	0	0	0	0	0		1.69669	2.0175	2.30969	2.00719	1.50084	1.45519	1.83118
37		0	0	0	0	0	0	1		1.69753	1.74726	2.03207	2.06947	1.71386	1.72158	1.83029
38		0	0	0	0	0	0	0		1.60178	1.75363	2.09438	1.98184	1.71344	1.82007	1.82752
39		0	0	0	0	0	0	0		1.56391	2.05447	2.37065	2.08773	1.40602	1.47948	1.82704
40		0	0	0	0	0	0	0		1.62208	1.96542	2.24903	2.01932	1.58834	1.51344	1.82627
41		0	0	0	0	0	0	0		1.58147	1.77286	2.19111	2.31563	1.52168	1.55751	1.82338
42		0	0	0	0	0	0	0		1.69612	1.83208	2.27332	2.03632	1.48489	1.61156	1.82238
43		0	0	0	0	0	0	0		1.88745	2.20773	2.23398	1.85701	1.40445	1.32488	1.81925
44		0	0	0	0	0	0	0		1.63872	1.92692	2.06645	2.24977	1.44538	1.55245	1.81328
45		0	0	0	0	0	0	0		1.76828	1.97154	1.96294	1.76714	1.68825	1.71931	1.81291
46		0	0	0	0	0	0	0		1.55475	1.87428	2.054	2.29991	1.44607	1.64629	1.81255
47		0	0	0	0	0	0	0		1.70303	1.87452	2.24916	2.07803	1.52155	1.43445	1.81012
48		0	0	0	0	0	0	0		1.58934	1.71247	2.41138	2.05155	1.42228	1.66919	1.80937
49		0	0	0	0	0	0	0		1.58288	2.01119	2.01352	1.80464	1.50527	1.92979	1.80788
50		0	0	0	0	0	0	0		1.68522	2.09214	2.08109	1.9062	1.48712	1.53721	1.79816
51		0	0	0	0	0	0	0		1.40649	1.90817	2.19693	1.95898	1.63902	1.6688	1.7964
52		0	0	0	0	0	0	0		1.64552	1.94369	2.02928	1.85597	1.59154	1.6694	1.78923
53		0	0	0	0	0	0	0		1.63239	1.76129	2.16465	1.82906	1.56933	1.7759	1.78877
54		0	0	0	0	0	0	0		1.59164	1.7286	2.24633	2.10487	1.54337	1.51066	1.78758
55		0	0	0	0	0	0	0		1.98476	1.92121	2.14137	1.85291	1.39723	1.4199	1.78623
56		0	0	0	0	0	0	0		1.73259	1.9253	2.00917	2.07274	1.50484	1.46314	1.78463
57		0	0	0	0	0	0	0		1.63094	1.89278	1.99725	2.0338	1.54284	1.60766	1.78421
58		0	0	0	0	0	0	0		1.53528	1.85742	1.96859	1.78427	1.56156	1.96359	1.77845
59		0	0	0	0	0	0	0		1.65372	1.97973	2.11919	1.95925	1.45383	1.49681	1.77709
60		0	0	0	0	0	0	0		1.63024	1.6891	1.90223	2.04314	1.61317	1.78322	1.77685
61		0	0	0	0	0	0	0		1.66163	1.8794	2.048	1.86551	1.51715	1.68657	1.77638
62		0	0	0	0	0	0	0		1.63322	2.02638	2.23259	1.99957	1.39009	1.37243	1.77571
63		0	0	0	0	0	0	0		1.66878	1.94736	1.99771	1.87372	1.55965	1.58973	1.77282
64		0	0	0	0	0	0	0		1.52672	1.88939	1.968	1.7341	1.59253	1.91324	1.77066
65		0	0	0	0	0	0	0		1.56252	1.73594	2.04069	2.04575	1.53748	1.69667	1.76984
66		0	0	0	0	0	0	0		1.57981	2.00288	1.96041	1.79746	1.62574	1.64638	1.76878
67		0	0	0	0	0	0	0		1.70328	1.86222	2.07923	1.89266	1.53398	1.53329	1.76744
68		0	0	0	0	0	0	0		1.58332	1.76556	2.00684	1.93959	1.59635	1.70957	1.76687
69		0	0	0	0	0	0	0		1.7077	2.00424	2.03811	1.88379	1.51233	1.44737	1.76559
70		0	0	0	0	0	0	0		1.39544	1.85415	2.14888	1.91836	1.57267	1.70163	1.76519
71		0	0	0	0	0	0	0		1.73568	1.881	2.00069	1.83911	1.5117	1.60599	1.76236
72		0	0	0	0	0	0	0		1.66206	1.9309	1.98561	1.73024	1.51694	1.742	1.76129
73		0	0	0	0	0	0	0		1.61056	1.82388	2.17616	1.99518	1.47623	1.48184	1.76064
74		0	0	0	0	0	0	0		1.67706	1.92607	2.14186	2.05154	1.43103	1.31661	1.75736
75		0	0	0	0	0	0	0		1.70352	1.87827	2.06267	1.99088	1.43985	1.46085	1.75601
76		0	0	0	0	0	0	0		1.70469	1.92078	2.05868	1.8986	1.46669	1.48343	1.75548
77		0	0	0	0	0	0	0		1.74944	2.05967	2.06742	1.76112	1.45404	1.42282	1.75242
78		0	0	0	0	0	0	0		1.65524	1.86619	2.04875	1.89983	1.51941	1.52179	1.75187
79		0	0	0	0	0	0	0		1.57287	1.72676	2.09915	1.78254	1.48745	1.84137	1.75169
80		0	0	0	0	0	0	0		1.49411	1.80187	2.25667	1.79191	1.51736	1.64368	1.75093
81		0	0	0	0	0	0	0		1.51273	1.77624	2.0478	1.82272	1.46808	1.87594	1.75059
82		0	0	0	0	0	0	0		1.60316	1.85489	2.01114	1.88736	1.52	1.62681	1.75056
83		0	0	0	0	0	0	0		1.6873	1.79235	2.06623	2.10243	1.32672	1.52621	1.75021
84		0	0	0	0	0	0	0		1.72037	1.81452	2.02664	1.89919	1.51296	1.52341	1.74951
85		0	0	0	0	0	0	0		1.61702	1.78712	2.06058	2.03391	1.44851	1.54737	1.74909
86		0	0	0	0	0	0	0		1.58661	1.98562	2.05309	1.76096	1.5261	1.57561	1.748
87		0	0	0	0	0	0	0		1.78144	1.94481	2.03351	1.86963	1.47887	1.3705	1.74646
88		0	0	0	0	0	0	0		1.65724	1.90634	2.10748	1.78727	1.54519	1.46813	1.74528
89		0	0	0	0	0	0	0		1.59492	1.88919	2.12532	1.84366	1.4198	1.59579	1.74478
90		0	0	0	0	0	0	0		1.68453	1.80422	2.05236	1.78981	1.60323	1.53429	1.74474
91		0	0	0	0	0	0	0		1.5666	1.78348	2.01672	1.80835	1.52935	1.7616	1.74435
92		0	0	0	0	0	0	0		1.77711	1.72656	2.04851	2.23711	1.39474	1.28036	1.74406
93		0	0	0	0	0	0	0		1.61339	1.73697	1.95054	1.85367	1.57324	1.73396	1.74363
94		0	0	0	0	0	0	0		1.69385	2.00582	1.90754	1.70392	1.52825	1.61888	1.74304
95		0	0	0	0	0	0	0		1.71858	1.87009	1.9748	1.75305	1.6788	1.46272	1.74301
96		0	0	0	0	0	0	0		1.57312	1.73343	2.07579	1.67671	1.57156	1.82012	1.74179
97		0	0	0	0	0	0	0		1.63287	1.86132	2.04255	2.0569	1.40966	1.44674	1.74167
98		0	0	0	0	0	0	0		1.64255	1.90398	2.04424	1.81397	1.57251	1.44012	1.73623
99		0	0	0	0	0	0	0		1.58591	1.72766	2.16178	1.87892	1.43972	1.62321	1.7362
100		0	0	0	0	0	0	0		1.62767	1.99592	2.00321	1.71797	1.5417	1.52179	1.73471
101		0	0	0	0	0	0	0		1.66053	1.85338	2.11673	1.83616	1.44824	1.49317	1.7347
102		0	0	0	0	0	0	0		1.66907	1.92866	2.05062	1.80705	1.37083	1.57102	1.73288
103		0	0	0	0	0	0	0		1.76857	1.94575	1.98	1.75036	1.43932	1.51307	1.73284
104		0	0	0	0	0	0	0		1.62953	1.98158	2.04558	1.85986	1.4146	1.46531	1.73274
105		0	0	0	0	0	0	0		1.62579	1.8675	2.10209	1.74264	1.3934	1.65194	1.73056
106		0	0	0	0	0	0	0		1.72983	1.86894	1.94666	1.70318	1.60438	1.52205	1.72917
107		0	0	0	0	0	0	0		1.65493	1.72194	1.99937	1.75769	1.51035	1.72014	1.7274
108		0	0	0	0	0	0	0		1.56392	1.81515	2.03867	1.78084	1.60065	1.56466	1.72731
109		0	0	0	0	0	0	0		1.71416	1.75669	2.0548	1.83016	1.57407	1.43328	1.72719
110		0	0	0	0	0	0	0		1.77943	1.88314	1.93678	1.78232	1.51071	1.4673	1.72661
111		0	0	0	0	0	0	0		1.89899	1.79376	1.97405	1.76598	1.41908	1.4908	1.72378
112		0	0	0	0	0	0	0		1.53934	1.77922	2.01687	1.87056	1.46152	1.6662	1.72229
113		0	0	0	0	0	0	0		1.73415	1.83881	1.9216	1.82726	1.50892	1.49168	1.7204
114		0	0	0	0	0	0	0		1.61957	1.84013	1.86817	1.61907	1.71689	1.65423	1.71968
115		0	0	0	0	0	0	0		1.69814	1.83898	2.05938	1.88926	1.41277	1.418	1.71942
116		0	0	0	0	0	0	0		1.73278	1.86958	1.94637	1.76448	1.4754	1.52461	1.71887
117		0	0	0	0	0	0	0		1.73278	1.86958	1.94637	1.76448	1.4754	1.52461	1.71887
118		0	0	0	0	0	0	0		1.60486	1.93092	1.93332	1.81409	1.47292	1.54465	1.71679
119		0	0	0	0	0	0	0		1.6227	1.77468	1.90553	1.79643	1.48482	1.69187	1.71267
120		0	0	0	0	0	0	0		1.75987	1.91865	1.97617	1.68347	1.45043	1.48438	1.71216
121		0	0	0	0	0	0	0		1.56888	1.81801	1.83851	1.78985	1.58125	1.67283	1.71155
122		0	0	0	0	0	0	0		1.72139	1.92942	2.02025	1.87131	1.39787	1.32556	1.71097
123		0	0	0	0	0	0	0		1.5722	1.76893	1.94544	1.74415	1.59305	1.64072	1.71075
124		0	0	0	0	0	0	0		1.63568	1.75907	2.00806	1.68517	1.39948	1.77696	1.71074
125		0	0	0	0	0	0	0		1.63007	1.77803	2.0575	1.82358	1.54725	1.41828	1.70912
126		0	0	0	0	0	0	0		1.60827	1.80413	1.89853	1.67526	1.56159	1.7038	1.7086
127		0	0	0	0	0	0	0		1.60827	1.80413	1.89853	1.67526	1.56159	1.7038	1.7086
128		0	0	0	0	0	0	0		1.63243	1.96152	2.11993	1.67633	1.42003	1.4408	1.70851
129		0	0	0	0	0	0	0		1.6279	2.0282	1.97243	1.71108	1.5148	1.38708	1.70691
130		0	0	0	0	0	0	0		1.59421	1.78634	2.02373	1.91223	1.49626	1.40699	1.70329
131		0	0	0	0	0	0	0		1.58872	1.9098	1.96065	1.90575	1.43215	1.42242	1.70325
132		0	0	0	0	0	0	0		1.75306	1.92184	1.98771	1.66952	1.47768	1.3842	1.699
133		0	0	0	0	0	0	0		1.72964	1.80891	1.89966	1.6355	1.54217	1.57812	1.699
134		0	0	0	0	0	0	0		1.61509	1.73489	2.14717	2.19859	1.29598	1.19981	1.69859
135		0	0	0	0	0	0	0		1.63019	1.91052	1.92509	1.7705	1.53798	1.41641	1.69845
136		0	0	0	0	0	0	0		1.51855	1.73637	2.07841	1.66293	1.44438	1.74712	1.69796
137		0	0	0	0	0	0	0		1.54955	1.91827	1.97952	1.86421	1.35298	1.52044	1.69749
138		0	0	0	0	0	0	0		1.46628	1.65429	1.95357	2.03535	1.5278	1.54224	1.69659
139		0	0	0	0	0	0	0		1.56421	1.82364	2.03621	1.99928	1.47483	1.27791	1.69601
140		0	0	0	0	0	0	0		1.62861	1.79173	1.95535	1.92695	1.37914	1.46704	1.69147
141		0	0	0	0	0	0	0		1.8527	1.78389	1.95856	1.67088	1.41284	1.45604	1.68915
142		0	0	0	0	0	0	0		1.62204	1.78344	1.85179	1.69428	1.48044	1.70207	1.68901
143		0	0	0	0	0	0	0		1.61324	1.76484	1.96136	1.8823	1.46946	1.44065	1.68864
144		0	0	0	0	0	0	0		1.56624	1.94764	1.8622	1.74648	1.45715	1.55048	1.68837
145		0	0	0	0	0	0	0		1.69339	1.88184	1.88155	1.73118	1.38613	1.55108	1.68753
146		0	0	0	0	0	0	0		1.73937	1.74368	1.92771	1.73761	1.4197	1.53258	1.68344
147		0	0	0	0	0	0	0		1.75233	1.71468	1.94637	1.72196	1.45992	1.50446	1.68329
148		0	0	0	0	0	0	0		1.64658	1.72772	1.88377	1.64378	1.58908	1.601	1.68199
149		0	0	0	0	0	0	0		1.5906	1.84199	1.93737	1.8915	1.41957	1.40663	1.68128
150		0	0	0	0	0	0	0		1.64204	1.75285	1.8615	1.61845	1.51743	1.69383	1.68102
151		0	0	0	0	0	0	0		1.63841	1.87522	1.89777	1.65955	1.48398	1.52963	1.68076
152		0	0	0	0	0	0	0		1.51295	1.72615	1.93562	1.73827	1.49614	1.67164	1.68013
153		0	0	0	0	0	0	0		1.60566	1.86678	1.97938	1.86508	1.34905	1.41386	1.67997
154		0	0	0	0	0	0	0		1.64539	1.74933	1.87081	1.71987	1.61202	1.4803	1.67962
155		0	0	0	0	0	0	0		1.65256	1.82766	1.93213	1.74451	1.46615	1.4211	1.67402
156		0	0	0	0	0	0	0		1.63733	1.70957	1.90361	1.82328	1.45405	1.51003	1.67298
157		0	0	0	0	0	0	0		1.63198	1.90308	1.95574	1.68778	1.41414	1.44035	1.67218
158		0	0	0	0	0	0	0		1.65544	1.83874	2.01339	1.79157	1.38445	1.34805	1.67194
159		0	0	0	0	0	0	0		1.57858	1.57206	1.93169	1.81143	1.47948	1.65275	1.671
160		0	0	0	0	0	0	0		1.60707	1.60876	2.0158	1.88051	1.43578	1.47647	1.67073
161		0	0	0	0	0	0	0		1.55323	1.78533	1.89297	1.80036	1.46214	1.51422	1.66804
162		0	0	0	0	0	0	0		1.55288	1.78305	1.94713	1.75837	1.45302	1.51346	1.66799
163		0	0	0	0	0	0	0		1.61147	1.85188	1.84203	1.60805	1.45362	1.63971	1.66779
164		0	0	0	0	0	0	0		1.58366	1.6541	1.9293	1.72965	1.49145	1.60691	1.66584
165		0	0	0	0	0	0	0		1.61478	1.76172	1.85661	1.74334	1.46212	1.55516	1.66562
166		0	0	0	0	0	0	0		1.69348	1.82291	1.96305	1.58958	1.50891	1.40875	1.66445
167		0	0	0	0	0	0	0		1.66433	1.84807	1.9276	1.66903	1.44808	1.41979	1.66282
168		0	0	0	0	0	0	0		1.59686	1.83102	1.8948	1.78256	1.41716	1.45349	1.66265
169		0	0	0	0	0	0	0		1.63622	1.79499	1.88951	1.7789	1.42477	1.44384	1.66137
170		0	0	0	0	0	0	0		1.72044	1.78729	1.90368	1.89407	1.3553	1.30052	1.66022
171		0	0	0	0	0	0	0		1.53695	1.64134	1.87477	1.65878	1.55135	1.65219	1.65256
172		0	0	0	0	0	0	0		1.53676	1.85402	1.89254	1.67703	1.35461	1.56153	1.64608
173		0	0	0	0	0	0	0		1.5004	1.71989	1.89767	1.65526	1.47663	1.61559	1.64424
174		0	0	0	0	0	0	0		1.55738	1.89987	1.84635	1.64696	1.47585	1.43732	1.64396
175		0	0	0	0	0	0	0		1.55616	1.71388	1.92896	1.60285	1.52692	1.52457	1.64222
176		0	0	0	0	0	0	0		1.64164	1.74535	1.9361	1.67691	1.44081	1.39576	1.63943
177		0	0	0	0	0	0	0		1.64435	1.69515	1.88448	1.65882	1.40232	1.53704	1.63703
178		0	0	0	0	0	0	0		1.61112	1.74136	1.8994	1.62503	1.47701	1.46648	1.63673
179		0	0	0	0	0	0	0		1.65884	1.64859	1.88877	1.68067	1.46775	1.45262	1.63287
180		0	0	0	0	0	0	0		1.5887	1.59648	1.92199	1.56686	1.53103	1.58811	1.6322
181		0	0	0	0	0	0	0		1.68132	1.80593	1.89515	1.5951	1.3965	1.41284	1.63114
182		0	0	0	0	0	0	0		1.57191	1.65005	1.83941	1.62719	1.51179	1.55841	1.62646
183		0	0	0	0	0	0	0		1.57191	1.65005	1.83941	1.62719	1.51179	1.55841	1.62646
184		0	0	0	0	0	0	0		1.54127	1.70202	1.85727	1.58443	1.44087	1.62806	1.62565
185		0	0	0	0	0	0	0		1.57978	1.69416	1.90843	1.64365	1.48473	1.41635	1.62118
186		0	0	0	0	0	0	0		1.55451	1.66984	1.83302	1.55787	1.47893	1.58013	1.61238
187		0	0	0	0	0	0	0		1.56564	1.70879	1.84856	1.65535	1.4086	1.42794	1.60248
188		0	0	0	0	0	0	0		1.55089	1.68075	1.84777	1.56284	1.44361	1.47536	1.59354
189		0	0	0	0	0	0	0		1.53064	1.65375	1.83909	1.62296	1.37278	1.46825	1.58125
190		1	1	1	1	1	1	1		2.14754	2.592	3.23141	2.88037	3.7081	2.01323	2.76211
191		1	0	1	1	1	1	0		1.8451	2.99705	3.5264	3.17213	2.54646	2.24817	2.72255
192		1	0	0	0	0	1	1		1.61168	2.69201	2.85132	3.124	2.14862	3.05751	2.58086
193		1	0	1	1	1	1	0		1.75804	2.54585	3.28554	2.77889	3.2428	1.60619	2.53622
194		1	1	1	1	1	1	0		1.80425	2.63665	3.02222	2.73816	2.78896	1.89299	2.48054
195		1	0	1	1	1	1	0		2.38412	2.28611	3.19275	2.7564	2.75798	1.48316	2.47675
196		1	0	0	0	0	1	1		2.14169	2.636	2.71021	2.74534	2.39898	2.06282	2.44917
197		1	1	1	0	0	0	0		1.69421	2.13065	2.84678	2.73041	3.26546	1.8577	2.42087
198		1	0	1	1	1	1	0		1.84341	2.81146	2.73989	2.71095	2.53317	1.78332	2.4037
199		1	0	1	1	1	0	0		1.88731	2.91141	2.99075	2.5593	2.291	1.72474	2.39409
200		1	0	1	1	1	1	0		1.90093	2.20674	2.64802	2.58552	2.72424	2.26464	2.38835
201		1	0	0	0	0	1	1		1.84245	2.22794	2.92169	3.05308	2.37058	1.88733	2.38384
202		1	0	0	1	1	1	1		1.8494	2.46896	2.36532	2.49013	2.86023	2.26325	2.38288
203		1	0	1	1	1	1	0		2.06391	2.2221	2.95648	3.03315	2.06304	1.90578	2.37408
204		1	0	0	0	0	0	0		1.74447	1.91568	2.72422	2.77608	2.47075	2.53551	2.36112
205		1	0	0	0	1	1	1		1.70054	2.0101	2.59585	2.79411	2.3494	2.48721	2.32287
206		1	1	1	1	1	0	0		1.60821	2.95396	3.19912	2.36875	1.95363	1.69547	2.29652
207		1	0	0	0	0	1	1		1.81991	2.06355	2.62273	2.42446	2.53472	2.28481	2.2917
208		1	0	1	1	1	1	1		1.78518	2.09045	2.43767	2.33449	2.91447	2.11641	2.27978
209		1	0	0	0	0	1	1		1.79557	2.20819	2.63227	2.74843	2.4539	1.83057	2.27816
210		1	0	0	0	0	1	0		1.69893	2.11881	2.61293	2.67532	2.2954	2.22919	2.27176
211		1	0	0	1	1	1	0		1.78744	2.04463	2.4016	2.38584	2.87386	2.1016	2.26583
212		1	0	0	0	0	1	1		1.67305	2.07192	2.53064	2.67842	2.40448	2.17577	2.25571
213		1	0	1	1	1	1	1		1.95622	2.37751	2.61125	2.59901	1.98888	1.94078	2.24561
214		1	1	1	1	1	1	0		1.66678	2.78975	2.9597	2.38496	2.01168	1.56154	2.22907
215		1	1	1	1	1	1	0		1.84066	2.1407	2.60434	2.46763	2.41934	1.86987	2.22376
216		1	0	0	0	0	1	1		1.885	2.22955	2.30341	2.37461	2.28689	2.20687	2.21439
217		1	0	0	0	0	1	1		1.67911	2.27417	2.30346	2.84866	2.24824	1.76377	2.18623
218		1	1	1	1	1	0	0		1.64682	2.55287	2.81025	2.4825	1.79606	1.71789	2.16773
219		1	1	1	1	1	1	0		1.63733	2.24529	3.04419	2.62902	1.63864	1.77321	2.16128
220		1	0	0	1	1	0	0		1.62535	2.8188	2.69234	2.17302	2.03194	1.57254	2.15233
221		1	0	0	0	0	1	1		1.71867	1.8693	2.2723	2.30857	2.85101	1.84191	2.14363
222		1	0	0	0	1	1	1		1.72848	1.88425	2.37904	2.43647	2.1784	2.24845	2.14251
223		1	0	0	1	1	1	0		1.5722	2.3971	2.86338	2.58027	1.96868	1.46237	2.14067
224		1	0	0	0	1	1	1		1.53068	2.11537	2.55542	2.22707	2.40013	1.88883	2.11958
225		1	1	1	1	0	1	0		1.60768	2.17947	2.78307	2.54113	1.97882	1.56352	2.10895
226		1	1	1	0	0	1	0		1.84514	2.81242	2.90437	2.03649	1.50942	1.53558	2.10724
227		1	0	0	0	0	1	1		1.64178	2.16421	2.15641	2.71372	2.08661	1.85816	2.10348
228		1	0	0	0	0	1	1		1.74606	2.13565	2.37765	2.35446	2.20701	1.76578	2.09777
229		1	0	0	0	0	1	1		1.63665	1.81913	2.44414	2.23556	2.38093	2.05425	2.09511
230		1	0	1	1	1	1	0		1.75891	2.22435	2.6253	2.30755	2.05369	1.57323	2.0905
231		1	0	0	1	1	1	0		1.75891	2.22435	2.6253	2.30755	2.05369	1.57323	2.0905
232		1	1	1	1	1	1	0		1.54719	2.29443	2.72595	2.75896	1.53986	1.6628	2.0882
233		1	0	0	0	0	1	1		1.58898	1.8899	2.07953	2.10741	2.58181	2.1863	2.07232
234		1	1	1	1	0	0	0		1.47083	2.28978	2.60181	2.69255	1.85623	1.48944	2.06677
235		1	1	1	1	1	1	0		1.77975	2.54312	2.41589	2.50913	1.58695	1.4587	2.04892
236		1	0	0	0	0	1	0		1.65688	2.27413	2.31956	2.28781	1.99741	1.75292	2.04812
237		1	0	0	0	0	1	1		1.63751	1.80903	2.08279	2.34147	2.25703	2.1454	2.04554
238		1	0	1	1	1	0	0		1.61512	2.06128	2.63044	2.40224	1.79699	1.71113	2.0362
239		1	0	0	0	0	1	1		1.73627	1.78474	2.38209	2.31736	1.96567	2.03006	2.03603
240		1	0	0	1	1	1	0		1.67316	2.0929	2.53336	2.41067	1.87648	1.60706	2.03227
241		1	0	0	1	1	1	0		1.66027	2.25946	2.49314	2.24535	1.96611	1.56492	2.03154
242		1	0	0	0	0	1	1		1.57119	1.6395	2.01196	1.96899	2.3175	2.65868	2.02797
243		1	1	1	1	1	1	0		1.53893	2.00184	2.5953	2.4384	2.04794	1.53423	2.02611
244		1	1	0	0	0	1	0		1.87245	2.37825	2.70034	2.38413	1.47081	1.33244	2.02307
245		1	1	1	1	1	0	0		1.78483	2.11767	2.61631	2.36422	1.61737	1.62093	2.02022
246		1	0	0	0	0	1	1		1.69429	1.78351	2.28701	2.26353	2.28472	1.80632	2.0199
247		1	1	1	0	0	1	0		1.77768	2.14916	2.68001	2.51948	1.5383	1.44672	2.01856
248		1	0	0	0	0	1	1		1.59065	1.89772	2.07238	2.2711	2.01441	2.24827	2.01575
249		1	0	0	1	1	0	0		1.66628	2.10471	2.6035	2.3988	1.84324	1.43521	2.00862
250		1	0	0	0	0	1	1		1.55305	2.13148	2.21027	2.53864	1.94321	1.63449	2.00186
251		1	1	1	0	0	0	0		1.69192	2.22369	2.93884	2.15976	1.50611	1.46344	1.99729
252		1	0	1	1	0	0	0		1.66221	2.12926	2.27975	2.81805	1.42205	1.64027	1.99193
253		1	1	1	1	1	0	0		1.76228	2.20242	2.59538	2.28005	1.55903	1.52713	1.98771
254		1	0	0	0	0	1	0		1.69387	1.89585	2.26406	2.4321	1.877	1.75197	1.98581
255		1	1	1	1	1	0	0		1.63512	2.1812	2.75925	2.40457	1.51745	1.39668	1.98238
256		1	0	0	0	0	1	1		1.54744	1.74494	1.99781	1.88843	2.2429	2.44194	1.97724
257		1	1	1	0	0	0	0		1.74768	2.82508	2.34789	1.90633	1.38837	1.6344	1.97496
258		1	0	0	0	1	1	1		1.72464	1.98236	2.15956	2.19447	1.97061	1.81205	1.97395
259		1	0	0	1	1	0	0		1.76047	2.15989	2.47467	2.34197	1.58733	1.4813	1.96761
260		1	1	0	1	1	0	0		1.68834	2.41989	2.36519	2.15198	1.68469	1.49279	1.96715
261		1	0	0	1	1	0	0		1.74588	2.07057	2.69947	2.44877	1.48462	1.34781	1.96619
262		1	1	1	1	0	1	0		1.72755	1.9944	2.42527	2.222	1.74268	1.64239	1.95905
263		1	0	0	0	0	1	0		1.65825	1.95649	2.48483	2.29678	1.79052	1.56511	1.95866
264		1	0	0	0	0	1	1		1.68926	2.36146	2.09085	1.98397	2.0037	1.5723	1.95026
265		1	0	0	0	0	1	1		1.73235	2.06386	2.10562	2.10973	1.95794	1.70786	1.94623
266		1	0	0	0	0	1	0		1.82925	1.9334	2.30614	2.05949	1.89401	1.64514	1.94457
267		1	0	0	0	0	1	1		1.81101	1.90482	2.16591	2.1392	1.88618	1.68015	1.93121
268		1	1	1	1	1	1	0		1.66896	2.18972	2.26339	1.90486	1.98329	1.56934	1.92993
269		1	1	1	0	0	0	0		1.69158	2.27852	2.26124	2.20439	1.47256	1.609	1.91955
270		1	1	1	0	0	0	0		1.89834	2.10565	2.52559	2.23021	1.37246	1.2952	1.90457
271		1	0	1	1	0	0	0		1.65391	2.24654	2.27701	1.93993	1.57236	1.727	1.90279
272		1	0	0	0	0	0	1		1.70771	1.81307	2.04365	1.89731	1.97959	1.90291	1.89071
273		1	1	1	1	1	0	0		1.61907	1.99815	2.46298	2.07198	1.55417	1.6286	1.88916
274		1	0	0	0	0	1	1		1.74449	1.85023	1.99966	2.05349	2.02221	1.65291	1.88717
275		1	0	0	1	1	1	0		1.50399	1.90754	2.33736	2.05039	1.93754	1.56566	1.88375
276		1	0	1	1	1	0	0		1.61569	2.11575	2.2609	2.37058	1.38227	1.55522	1.8834
277		1	0	0	0	1	0	0		1.59295	1.82976	2.50062	2.23096	1.67639	1.4432	1.87898
278		1	0	0	0	0	1	1		1.6141	1.52955	2.14854	2.47669	1.97531	1.52091	1.87752
279		1	0	0	0	0	1	0		1.62338	1.91187	2.02408	2.29459	1.69856	1.69875	1.87521
280		1	1	1	0	0	1	0		1.66169	2.22646	2.25126	1.99338	1.56212	1.42194	1.85281
281		1	0	0	0	0	1	1		1.73757	1.86213	2.05063	2.0214	1.64718	1.79197	1.85181
282		1	0	1	1	0	0	0		1.62794	2.19654	2.20482	1.95904	1.53397	1.5858	1.85135
283		1	0	1	1	1	0	0		1.66732	2.05322	2.20182	2.05979	1.53051	1.5684	1.84684
284		1	0	0	0	0	0	1		1.61404	1.91424	2.04669	1.93558	1.79327	1.73656	1.84006
285		1	0	0	0	0	1	1		1.53378	1.72219	2.02911	1.78235	1.87555	1.98875	1.82195
286		1	0	0	0	0	1	1		1.58055	1.767	2.02265	1.9207	1.92958	1.70451	1.82083
287		1	0	0	0	0	1	1		1.59744	1.80281	2.15017	1.99973	1.69213	1.67904	1.82022
288		1	0	0	0	0	0	1		1.59744	1.80281	2.15017	1.99973	1.69213	1.67904	1.82022
289		1	0	0	0	0	1	0		1.6645	1.82524	2.1816	2.03497	1.65036	1.56297	1.81994
290		1	0	1	1	1	0	0		1.59292	1.85096	2.38546	2.03502	1.55446	1.48694	1.81763
291		1	1	0	1	1	0	0		1.52192	1.8447	2.57718	1.91997	1.53814	1.49446	1.81606
292		1	1	1	1	0	0	0		1.51256	2.03155	2.20851	2.29447	1.45351	1.38503	1.81427
293		1	0	0	0	0	1	1		1.6222	1.81565	2.08135	2.0259	1.59598	1.65333	1.79907
294		1	0	0	0	0	1	1		1.58645	1.67919	1.97005	1.841	2.03916	1.66339	1.79654
295		1	0	0	1	1	0	0		1.54307	1.89183	2.22763	2.15285	1.39037	1.52537	1.78852
296		1	0	0	0	0	1	1		1.76451	1.70388	2.09912	2.00845	1.51051	1.53592	1.7704
297		1	0	0	0	0	1	1		1.53126	1.68396	1.93513	1.91646	1.82437	1.72473	1.76932
298		1	0	0	0	0	1	1		1.60604	1.75762	2.02109	1.80167	1.67123	1.69128	1.75815
299		1	0	0	0	0	1	1		1.55861	1.71565	1.94692	1.7048	1.73134	1.74672	1.73401
300		1	0	0	0	0	1	1		1.42271	1.67507	2.04502	1.96335	1.72396	1.4798	1.71832
